# Supplementary material for: JAZ1-3 and MYC2-1 Synergistically Regulate the Transformation from Completely Mixed Flower Buds to Female Flower Buds in Castanea mollisima
Source: MDPI journal article supplement (doi:10.3390/ijms23126452), 2022-06-09
Supplement: s1 [file s1]

**Table S1.** Statistical table of sequencing data

| Sample | Raw reads  | Clean reads | Q20    | Q30    | GC content |
|--------|------------|-------------|--------|--------|------------|
| A1-1   | 49,554,196 | 49,441,236  | 97.21% | 92.51% | 45.66%     |
| A1-2   | 49,760,152 | 49,650,124  | 97.36% | 92.77% | 44.49%     |
| A1-3   | 53,129,682 | 52,980,430  | 97.01% | 92.05% | 45.14%     |
| A2-1   | 68,235,556 | 68,130,526  | 97.46% | 92.90% | 45.00%     |
| A2-2   | 51,626,882 | 51,508,162  | 97.33% | 92.64% | 44.73%     |
| A2-3   | 49,802,438 | 49,749,982  | 97.27% | 92.54% | 45.35%     |
| B1-1   | 59,550,256 | 59,411,332  | 97.17% | 92.41% | 44.32%     |
| B1-2   | 53,944,142 | 53,770,916  | 97.03% | 92.14% | 45.56%     |
| B1-3   | 48,819,904 | 48,695,530  | 96.85% | 91.78% | 44.71%     |
| B2-1   | 51,727,168 | 51,644,684  | 97.24% | 92.45% | 45.51%     |
| B2-2   | 56,081,438 | 55,995,120  | 97.38% | 92.79% | 45.58%     |
| B2-3   | 50,261,172 | 50,169,644  | 97.37% | 92.76% | 45.37%     |

**Table S2.** Clean reads comparison with reference genome

| Sample | Unmapped reads | Mapped reads | Multiple mapped reads | mapQuality $\geq$ 30(%) |
|--------|----------------|--------------|-----------------------|-------------------------|
| A1-1   | 21.82%         | 78.18%       | 1.24%                 | 75.86%                  |
| A1-2   | 15.85%         | 84.15%       | 1.32%                 | 81.68%                  |
| A1-3   | 19.04%         | 80.96%       | 1.28%                 | 78.58%                  |
| A2-1   | 19.31%         | 80.69%       | 1.45%                 | 77.99%                  |
| A2-2   | 17.58%         | 82.42%       | 1.43%                 | 79.77%                  |
| A2-3   | 22.20%         | 77.8%        | 1.33%                 | 75.33%                  |
| B1-1   | 39.29%         | 60.71%       | 1.00%                 | 58.86%                  |
| B1-2   | 25.62%         | 74.38%       | 1.10%                 | 72.31%                  |
| B1-3   | 34.83%)        | 65.17%       | 0.97%                 | 63.35%                  |
| B2-1   | 25.08%         | 74.92%       | 1.27%                 | 72.57%                  |
| B2-2   | 25.71%         | 74.29%       | 1.24%                 | 71.99%                  |
| B2-3   | 24.76%         | 75.24%       | 1.22%                 | 72.99%                  |

Note: Unmapped reads: There is no comparison of the number of reads on the genome; Mapped reads: Compare the number of reads in the last genome; Multiple mapped reads: The number of reads compared to multiple locations in the genome; map Quality  $\geq$  30: The following statistical items are based on the number of reads whose quality is not less than 30.

**Table S3.** Primers designed using Primer 5.0 software and used to real-time PCR analysis of GID1, GID2, DELLA1, DELLA2, MYC2-1, MYC2-2, MYC3, FT, LFY, SOC1, FLC, GA20ox1, GA3ox1 and SCF1 expression.

| Gene name | Primer1               | Primer2               |
|-----------|-----------------------|-----------------------|
| Actin     | TTGACTATGAGCAGGAAGCTT | TTGTAGGTGGTCTCGTGAAT  |
| GID1      | ACCTCAATGAATCCAAGAGG  | ACAATCTTGGTAGTGCTCAAG |
| GID2      | CGTGAGCTAGTAGAGAATGA  | TCATCAAAGAACTCAAGCCT  |
| DELLA1    | TTCCGATACCGTTCTCTACA  | AACTCTGTACATTCTGCTGC  |
| DELLA2    | GAGTGAAAGGTAGTGGTGAG  | GTAGCAGTAGTAGTAGGAGGA |

|        |                       |                        |
|--------|-----------------------|------------------------|
| MYC2-1 | ATCTCCTACAACACACCCTC  | TTGAAACTCACAGTTCCCAT   |
| MYC2-2 | CTTTGCAGCAATTCGCATT   | CATGCAACTTCACCAACTAC   |
| MYC3   | GGTGTGGAATGATGAGGAT   | TGAGAATTTGCATAGCTTGG   |
| FT     | AGCACTACATTTTCATCGTG  | CTTTCACATGGTGCTGTGA    |
| LFY    | AGCAGCAGTATACTCGGT    | CGTTGGTAGTGGTGTCAG     |
| SOC1   | GTGAGAGGAAAGACTCAGATG | GCATGTTCCCTAGACCTTCTC  |
| FLC    | CGAAAATAGCGTTGCTCTTT  | CTTGCTGTATACGAGTTCCA   |
| GA20-1 | ACCGATATGGGTAGTTTGACA | CGAGTATCGGTCCTTGAAT    |
| GA30-8 | CTGTAATGCAATGGAAGTGTG | GCAATGATGAGTCTGTATGAGG |
| SCF1   | GAGGAGGATGATGACGATG   | AGGCTCTTCCTCATCGCTT    |

**Table S4.** Linear regression equation of various hormones

| Hormones | Linear regression equation      | Coefficient(R <sup>2</sup> ) |
|----------|---------------------------------|------------------------------|
| ABA      | y = 28868.469x + 42055.7676     | 0.9988                       |
| cZ       | y = 1261566.7899x + 25073.7856  | 0.9999                       |
| DZ       | y = 808853.2338x - 1610845.7711 | 0.9982                       |
| H2JA     | y = 97365.564x - 180296.8617    | 0.9995                       |
| IAA      | y = 128094.5274x - 173184.0796  | 0.9982                       |
| IBA      | y = 23985.7527x + 380416.6667   | 0.997                        |
| ICA      | y = 506156.283x - 531119.3242   | 0.9936                       |
| IP       | y = 1671470.4329x + 84041.4467  | 0.9994                       |
| JA       | y = 61758.6022x + 890833.3333   | 0.9983                       |
| JA-ILE   | y = 37317.7419x - 232500        | 0.9999                       |
| ME-IAA   | y = 358913.0148x - 40086.4572   | 0.9993                       |
| MEJA     | y = 99588.8465x - 52682.3579    | 0.9996                       |
| SA       | y = 198185.4839x + 562500       | 0.999                        |
| tZ       | y = 716880.9398x + 182271.6473  | 0.9999                       |
| ABA      | y = 28868.469x + 42055.7676     | 0.9988                       |
| cZ       | y = 1261566.7899x + 25073.7856  | 0.9999                       |
| DZ       | y = 808853.2338x - 1610845.7711 | 0.9982                       |
| H2JA     | y = 97365.564x - 180296.8617    | 0.9995                       |
| IAA      | y = 128094.5274x - 173184.0796  | 0.9982                       |
| GA1      | y = 33269.1542x + 1021.4428     | 0.9933                       |
| GA15     | y = 191210.9375x - 57851.5625   | 0.9996                       |
| GA19     | y = 42057.8125x + 14070.3125    | 0.9994                       |
| GA20     | y = 116232.8125x + 27445.3125   | 0.9994                       |
| GA24     | y = 109976.3441x + 2333333.3333 | 0.997                        |
| GA3      | y = 90898.9247x + 2533333.3333  | 0.9968                       |
| GA4      | y = 55518.2796x + 1823333.3333  | 0.9903                       |
| GA53     | y = 40878.3465x - 6090.5512     | 0.9999                       |
| GA7      | y = 640906.25x - 254843.75      | 0.9987                       |
| GA9      | y = 24109.375x + 2484.375       | 0.9998                       |

**Table S5.** Five hormone levels in different flower buds

| Component | Group | Mean     | SD     | SE      |
|-----------|-------|----------|--------|---------|
| IAA       | A2    | 3.2667   | 0.0368 | 0.0212  |
| IAA       | A1    | 3.25     | 0.0498 | 0.0287  |
| IAA       | B2    | 3.2497   | 0.0115 | 0.0067  |
| IAA       | B1    | 3.2202   | 0.0125 | 0.0072  |
| ME-IAA    | A2    | 0.3247   | 0.0176 | 0.0102  |
| ME-IAA    | A1    | 0.344    | 0.0005 | 0.0003  |
| ME-IAA    | B2    | 0.3408   | 0.0015 | 0.0009  |
| ME-IAA    | B1    | 0.3437   | 0.0094 | 0.0054  |
| ICA       | A2    | 3.6062   | 0.0397 | 0.0229  |
| ICA       | A1    | 3.8114   | 0.0187 | 0.0108  |
| ICA       | B2    | 3.2788   | 0.0181 | 0.0105  |
| ICA       | B1    | 3.4368   | 0.0056 | 0.0032  |
| IP        | A2    | 0.4738   | 0.0094 | 0.0054  |
| IP        | A1    | 0.3131   | 0.0101 | 0.0058  |
| IP        | B2    | 0.5728   | 0.0077 | 0.0044  |
| IP        | B1    | 0.1187   | 0.0051 | 0.0029  |
| tZ        | A2    | 0.2561   | 0.0256 | 0.0148  |
| tZ        | A1    | 0.9487   | 0.0934 | 0.0539  |
| tZ        | B2    | 0.2182   | 0.0375 | 0.0216  |
| tZ        | B1    | 0.782    | 0.0192 | 0.0111  |
| cZ        | A2    | 0.1192   | 0.003  | 0.0017  |
| cZ        | A1    | 0.1279   | 0.0036 | 0.0021  |
| cZ        | B2    | 0.1773   | 0.0071 | 0.0041  |
| cZ        | B1    | 0.1843   | 0.0081 | 0.0047  |
| DZ        | A2    | 3.9801   | 0.0218 | 0.0126  |
| DZ        | A1    | 4.6086   | 0.0237 | 0.0137  |
| DZ        | B2    | 4.1027   | 0.0111 | 0.0064  |
| DZ        | B1    | 4.052    | 0.0276 | 0.016   |
| MEJA      | A2    | 111.2712 | 3.1177 | 1.8     |
| MEJA      | A1    | 1.936    | 0.0344 | 0.0199  |
| MEJA      | B2    | 1.6054   | 0.0257 | 0.0149  |
| MEJA      | B1    | 1.9521   | 0.024  | 0.0139  |
| JA        | A2    | 121.193  | 2.3204 | 1.3397  |
| JA        | A1    | 92.5858  | 0.7803 | 0.4505  |
| JA        | B2    | 135.3033 | 0.591  | 0.3412  |
| JA        | B1    | 76.0919  | 2.3786 | 1.3733  |
| H2JA      | A2    | 4.301    | 0.0358 | 0.0207  |
| H2JA      | A1    | 3.585    | 0.006  | 0.0035  |
| H2JA      | B2    | 3.6228   | 0.0387 | 0.0224  |
| H2JA      | B1    | 3.5569   | 0.0076 | 0.0044  |
| JA-ILE    | A2    | 140.9091 | 1.5021 | 0.8672  |
| JA-ILE    | A1    | 448.8522 | 21.233 | 12.2589 |

|        |    |          |         |        |
|--------|----|----------|---------|--------|
| JA-ILE | B2 | 182.6802 | 2.4612  | 1.421  |
| JA-ILE | B1 | 206.2527 | 3.2183  | 1.8581 |
| SA     | A2 | 238.5943 | 4.2762  | 2.4689 |
| SA     | A1 | 259.8331 | 5.0619  | 2.9225 |
| SA     | B2 | 327.8298 | 3.2336  | 1.8669 |
| SA     | B1 | 516.322  | 14.1466 | 8.1675 |
| ABA    | A2 | 50.7168  | 1.2259  | 0.7078 |
| ABA    | A1 | 17.8948  | 0.4057  | 0.2342 |
| ABA    | B2 | 32.15    | 0.8054  | 0.465  |
| ABA    | B1 | 18.7545  | 0.9024  | 0.521  |

**Table S6.** Gibberellin levels in different flower buds

| Variable | Group | Value  | SD     | SE     | CI     |
|----------|-------|--------|--------|--------|--------|
| GA9      | A2    | 1.9285 | 0.0302 | 0.0174 | 0.0749 |
| GA9      | A1    | 1.4717 | 0.0710 | 0.0410 | 0.1764 |
| GA9      | B2    | 1.3832 | 0.0810 | 0.0468 | 0.2012 |
| GA9      | B1    | 1.8879 | 0.0915 | 0.0528 | 0.2274 |
| GA19     | A2    | 4.2377 | 0.1613 | 0.0931 | 0.4007 |
| GA19     | A1    | 1.0967 | 0.0375 | 0.0216 | 0.0931 |
| GA19     | B2    | 2.2640 | 0.0815 | 0.0470 | 0.2024 |
| GA19     | B1    | 0.7291 | 0.0155 | 0.0089 | 0.0384 |
| GA20     | A2    | 0.6854 | 0.0292 | 0.0169 | 0.0727 |
| GA20     | A1    | 0.2858 | 0.0230 | 0.0133 | 0.0572 |
| GA20     | B2    | 0.6042 | 0.0083 | 0.0048 | 0.0205 |
| GA20     | B1    | 0.4740 | 0.0232 | 0.0134 | 0.0576 |
| GA53     | A2    | 0.3425 | 0.0041 | 0.0024 | 0.0103 |
| GA53     | A1    | 0.2522 | 0.0037 | 0.0021 | 0.0091 |
| GA53     | B2    | 0.3186 | 0.0024 | 0.0014 | 0.0059 |
| GA53     | B1    | 0.3151 | 0.0022 | 0.0013 | 0.0054 |

**Table S7.** Sampling time and number of chestnut flower buds

| Sample | Sapling time              | Sampling location                 |
|--------|---------------------------|-----------------------------------|
| A2-1   | Dec 17 <sup>th</sup> 2017 | The second bud from top to bottom |
| A2-2   | Dec 17 <sup>th</sup> 2017 | The second bud from top to bottom |
| A2-3   | Dec 17 <sup>th</sup> 2017 | The second bud from top to bottom |
| A1-1   | Mar 15 <sup>th</sup> 2018 | The second bud from top to bottom |
| A1-2   | Mar 15 <sup>th</sup> 2018 | The second bud from top to bottom |
| A1-3   | Mar 15 <sup>th</sup> 2018 | The second bud from top to bottom |
| B2-1   | Dec 17 <sup>th</sup> 2017 | The second bud from bottom to top |
| B2-2   | Dec 17 <sup>th</sup> 2017 | The second bud from bottom to top |
| B2-3   | Dec 17 <sup>th</sup> 2017 | The second bud from bottom to top |
| B1-1   | Mar 15 <sup>th</sup> 2018 | The second bud from bottom to top |
| B1-2   | Mar 15 <sup>th</sup> 2018 | The second bud from bottom to top |
| B1-3   | Mar 15 <sup>th</sup> 2018 | The second bud from bottom to top |

**Table S8.** Primers designed using Primer 5.0 software and used to vector construction primer.

| Gene name    | Primer1                          | Primer2                           |
|--------------|----------------------------------|-----------------------------------|
| CmJAZ1-3y1   | ggccatggagATGGCGAGCTCGTCGGAGTT   | acgtcgacCTACTGCTTTAGCTGAGCAGCCA   |
| CmMYC2-2y1   | ctgaattcATGTCACATTCTGCTCATTCCAT  | caggatccCTTGGTCCTTTTACCTTTAAGCC   |
| CmJAZ1-3d1   | ggctctagaATGGCGAGCTCGTCGGAGTT    | taggatccCTACTGCTTTAGCTGAGCAGCCA   |
| CmMYC2-2d1   | ggctctagaATGTCACATTCTGCTCATTCCAT | taggatccCTTGGTCCTTTTACCTTTAAGCC   |
| CmFT527d1    | atctcgagACGATGATTTAGGATGCTGGG    | caaagcttCCCTATACACAATAACAACCTTGGA |
| CmFT933d1    | atctcgagCAACGTAATGATTGAATGCGA    | ctaagcttCCCTATACACAATAACAACCTTGGA |
| CmLFY2-465d1 | atctcgagTGTCCCATCCACTCTTCCT      | ctaagcttAGCCTCGTAAGCAAATGCCA      |
| CmLFY2-674d1 | atctcgagCCTTCTATTTATCAGTCCCTCCT  | ctaagcttAGCCTCGTAAGCAAATGCCA      |
| CmLFY3-473d1 | atctcgagTTCGACTTATCGGTCAACCTAG   | ctaagcttAGACACTGACCTCAAGTATAGAA   |
| CmLFY3-878d1 | atctcgagTTTGATCGTGTATTTGAAGGC    | ctaagcttAGACACTGACCTCAAGTATAGAA   |
